# Supplementary material for: Formation of colloidal assemblies in suspensions for Pb(Mg1/3Nb2/3)O3 synthesis: Monte Carlo simulation study
Source: Royal Society of Chemistry journal article supplement (doi:10.1039/c1sm05228d), 2011-01-01

*Electronic Supplementary Information for:*  
**Formation of Colloidal Assemblies in Suspensions for  $\text{Pb}(\text{Mg}_{1/3}\text{Nb}_{2/3})\text{O}_3$   
Synthesis: Monte Carlo Simulation Study**

by Gregor Trefalt, Bosiljka Tadić and Marija Kosec

Jožef Stefan Institute, Jamova 39, 1000 Ljubljana, Slovenia

**Energy per particle plotted vs. MC steps for all six cases presented  
in the paper**

pH = 11.4 and pH = 12.5, equal-sized particles

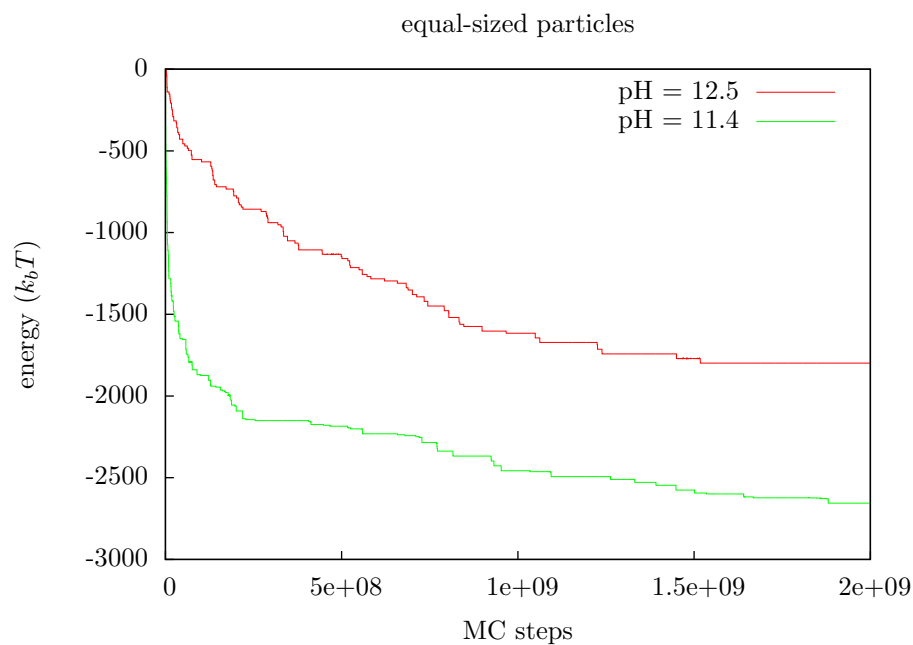

pH = 11.4 and pH = 12.5, smaller MHC particles

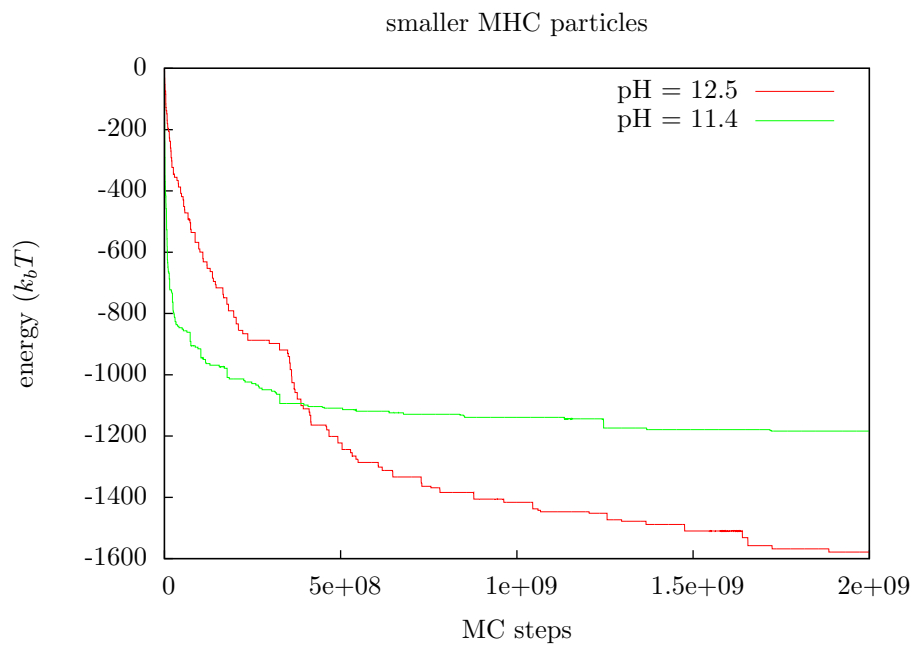

pH = 11.4 and pH = 12.5, bigger MHC particles

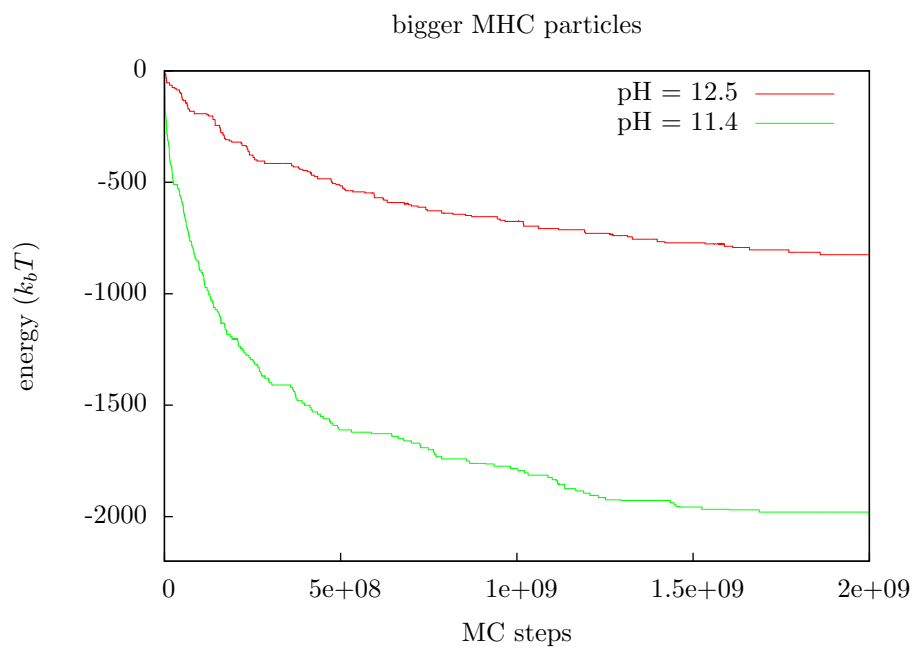

Supplement: c1sm05228d.pdf [file c1sm05228d.pdf]
